# Supplementary material for: Magnetic and thermoelectric properties of the ternary pseudo-hollandite BaxCr5Se8(0.5 < x < 0.55) solid solution
Source: Royal Society of Chemistry journal article supplement (doi:10.1039/c6dt02166b), 2016-01-01
Supplement: c6dt02166b1.pdf [file c6dt02166b1.pdf]

Supplementary Table Captions STable 1. Atomic coordinates (x,y,z), isotropic displacement parameters and site occupancy factors and their estimated standard deviations found with the Rietveld refinement results from bulk samples of  $\text{Ba}_x\text{Cr}_5\text{Se}_8$

STable 2. Main distances extracted from Rietveld refinement on bulk samples of  $\text{Ba}_x\text{Cr}_5\text{Se}_8$

Supplementary Figure Caption:

SFigure 1. Temperature dependence of the magnetic susceptibility for  $\text{Ba}_x\text{Cr}_5\text{Se}_8$  measured under a magnetic field of 0.1 T for  $x = 0.5, 0.55$  and  $0.6$ . An antiferromagnetic transition is observed at 58 K, where the derivative of the curve is maximum. Only the 0.6 content sample shows a ferrimagnetic transition, with a transition temperature tending to the one of  $\text{Ba}_{1-p}\text{Cr}_2\text{Se}_4$ .

**STable 1. Atomic coordinates (x,y,z), isotropic displacement parameters and site occupancy factors and their estimated standard deviations found with the Rietveld refinement results from bulk samples of Ba<sub>x</sub>Cr<sub>5</sub>Se<sub>8</sub>**

| Atoms | x = 0.5  |            |           |             |                  | x = 0.51 |            |           |             |                  | x = 0.52 |            |           |             |                  | x = 0.55 |            |           |             |                  |
|-------|----------|------------|-----------|-------------|------------------|----------|------------|-----------|-------------|------------------|----------|------------|-----------|-------------|------------------|----------|------------|-----------|-------------|------------------|
|       | s.o.f    | x          | y         | z           | U <sub>iso</sub> | s.o.f    | x          | y         | z           | U <sub>iso</sub> | s.o.f    | x          | y         | z           | U <sub>iso</sub> | s.o.f    | x          | y         | z           | U <sub>iso</sub> |
| Ba(1) | 0.874(7) | 0          | 0         | 0           | 0.020(4)         | 0.906(7) | 0          | 0         | 0           | 0.019(3)         | 0.904(7) | 0          | 0         | 0           | 0.031(3)         | 0.861(8) | 0          | 0         | 0           | 0.043(3)         |
| Ba(2) | 0.126(7) | 0          | 0.5       | 0           | 0.025(4)         | 0.114(7) | 0          | 0.5       | 0           | 0.019(3)         | 0.136(7) | 0          | 0.5       | 0           | 0.031(3)         | 0.239(8) | 0          | 0.5       | 0           | 0.043(3)         |
| Cr(1) | 1        | 0.996(2)   | 0.749(3)  | 0.510(2)    | 0.004(4)         | 1        | 0.999(2)   | 0.752(3)  | 0.506(3)    | -0.001(4)        | 1        | 1.000(2)   | 0.746(3)  | 0.506(2)    | 0.004(3)         | 1        | 0.998(3)   | 0.745(3)  | 0.509(2)    | 0.006(3)         |
| Cr(2) | 1        | 0.5894(18) | 0.397(5)  | 0.1543(17)  | 0.011(2)         | 1        | 0.5903(19) | 0.399(5)  | 0.1559(17)  | 0.0059(17)       | 1        | 0.5909(19) | 0.399(5)  | 0.1621(16)  | 0.0103(16)       | 1        | 0.590(2)   | 0.397(4)  | 0.1595(16)  | 0.0098(15)       |
| Cr(3) | 1        | 0.685(2)   | -0.082(6) | 0.5285(19)  | 0.014(3)         | 1        | 0.6862(19) | -0.080(5) | 0.5286(17)  | 0.008(3)         | 1        | 0.688(2)   | -0.076(6) | 0.5210(16)  | 0.012(2)         | 1        | 0.686(2)   | -0.083(4) | 0.5230(17)  | 0.013(2)         |
| Cr(4) | 1        | 0.407(2)   | 0.096(5)  | -0.1761(18) | 0.011(2)         | 1        | 0.411(2)   | 0.101(5)  | -0.1705(18) | 0.0059(17)       | 1        | 0.411(2)   | 0.095(5)  | -0.1692(16) | 0.0103(16)       | 1        | 0.407(2)   | 0.091(4)  | -0.1705(17) | 0.0098(15)       |
| Cr(5) | 1        | 0.686(2)   | 0.419(6)  | 0.515(2)    | 0.014(3)         | 1        | 0.688(2)   | 0.423(5)  | 0.5129(18)  | 0.008(3)         | 1        | 0.684(2)   | 0.417(6)  | 0.5200(16)  | 0.012(2)         | 1        | 0.683(2)   | 0.412(4)  | 0.5197(17)  | 0.013(2)         |
| Se(1) | 1        | 0.8527(15) | 0.969(4)  | 0.3330(13)  | 0.006(2)         | 1        | 0.8511(15) | 0.966(3)  | 0.3388(13)  | 0.0026(18)       | 1        | 0.8526(14) | 0.965(4)  | 0.3352(12)  | 0.0037(16)       | 1        | 0.8545(15) | 0.968(3)  | 0.3341(13)  | 0.0024(16)       |
| Se(2) | 1        | 0.4832(14) | 0.375(4)  | 0.6548(13)  | 0.0047(19)       | 1        | 0.4835(13) | 0.375(3)  | 0.6576(13)  | -0.0006(17)      | 1        | 0.4770(12) | 0.372(4)  | 0.6627(11)  | 0.0043(16)       | 1        | 0.4777(13) | 0.371(3)  | 0.6631(12)  | 0.0029(16)       |
| Se(3) | 1        | 0.6639(13) | 0.169(4)  | -0.0009(14) | 0.0091(17)       | 1        | 0.6669(14) | 0.166(4)  | 0.0045(15)  | 0.0050(15)       | 1        | 0.6639(13) | 0.163(4)  | 0.0113(12)  | 0.0046(14)       | 1        | 0.6643(13) | 0.160(3)  | 0.0124(12)  | 0.0035(13)       |
| Se(4) | 1        | 0.8290(15) | 0.711(3)  | 0.6797(14)  | 0.0072(19)       | 1        | 0.8319(14) | 0.708(3)  | 0.6812(13)  | 0.0032(18)       | 1        | 0.8309(13) | 0.708(3)  | 0.6780(12)  | 0.0048(16)       | 1        | 0.8319(14) | 0.712(3)  | 0.6768(13)  | 0.0044(15)       |
| Se(5) | 1        | 0.8532(15) | 0.464(4)  | 0.3467(13)  | 0.006(2)         | 1        | 0.8560(15) | 0.469(3)  | 0.3392(12)  | 0.0026(18)       | 1        | 0.8523(14) | 0.467(4)  | 0.3419(11)  | 0.0037(16)       | 1        | 0.8502(14) | 0.470(3)  | 0.3433(12)  | 0.0024(16)       |
| Se(6) | 1        | 0.4771(14) | -0.129(4) | 0.6584(12)  | 0.0041(19)       | 1        | 0.4785(13) | -0.130(3) | 0.6572(12)  | -0.0006(17)      | 1        | 0.4823(12) | -0.132(4) | 0.6494(11)  | 0.0043(16)       | 1        | 0.4824(13) | -0.129(3) | 0.6508(11)  | 0.0029(16)       |
| Se(7) | 1        | 0.3318(13) | 0.327(4)  | -0.0111(12) | 0.0091(17)       | 1        | 0.3327(14) | 0.326(4)  | -0.0046(14) | 0.0050(15)       | 1        | 0.3315(13) | 0.326(4)  | 0.0003(11)  | 0.0046(14)       | 1        | 0.3330(14) | 0.324(3)  | 0.0023(12)  | 0.0035(13)       |
| Se(8) | 1        | 0.8320(15) | 0.202(3)  | 0.6835(13)  | 0.0075(19)       | 1        | 0.8290(14) | 0.204(3)  | 0.6825(13)  | 0.0032(18)       | 1        | 0.8294(13) | 0.205(3)  | 0.6849(12)  | 0.0048(16)       | 1        | 0.8277(14) | 0.206(3)  | 0.6852(13)  | 0.0044(15)       |

\* U<sub>iso</sub> fixed for Ba(1)-Ba(2), Cr(2)-Cr(4), Cr(3)-Cr(5), Se(1)-Se(5), Se(2)-Se(6), Se(3)-Se(7) and Se(4)-Se(8) as explicated in the main paper.

**STable 2. Main distances extracted from Rietveld refinement on bulk samples of  $\text{Ba}_x\text{Cr}_5\text{Se}_8$**

|                                                       | at 1  | at    | x = 0.5 [12] | x = 0.51<br>[This work] | x = 0.52<br>[This work] | x = 0.55<br>[This work] |
|-------------------------------------------------------|-------|-------|--------------|-------------------------|-------------------------|-------------------------|
| tunneled Ba-Se                                        | Ba(1) | Se(4) | 3.402(15)    | 3.402(14)               | 3.422(15)               | 3.414(13)               |
|                                                       |       | Se(8) | 3.359(16)    | 3.387(15)               | 3.374(15)               | 3.381(14)               |
|                                                       | Ba(2) | Se(4) | 3.429(16)    | 3.399(15)               | 3.425(15)               | 3.442(14)               |
|                                                       |       | Se(8) | 3.409(15)    | 3.411(14)               | 3.391(14)               | 3.388(13)               |
| lowest and largest<br>In-plane and in-<br>chain Cr-Se | Cr(1) | Se(1) |              | 2.45(3)                 |                         |                         |
|                                                       |       | Se(4) | 2.43(3)      |                         | 2.46(3)                 | 2.41(3)                 |
|                                                       |       | Se(8) | 2.64(3)      | 2.60(3)                 | 2.62(3)                 | 2.66(3)                 |
|                                                       | Cr(2) | Se(3) |              | 2.47(4)                 | 2.47(4)                 | 2.46(3)                 |
|                                                       |       | Se(7) | 2.46(4)      |                         |                         |                         |
|                                                       |       | Se(6) | 2.64(4)      | 2.65(3)                 | 2.66(3)                 | 2.67(3)                 |
|                                                       |       | Se(4) | 2.40(4)      |                         |                         | 2.41(3)                 |
|                                                       | Cr(3) | Se(8) |              | 2.44(3)                 | 2.46(4)                 |                         |
|                                                       |       | Se(2) | 2.66(4)      | 2.70(3)                 | 2.68(4)                 | 2.64(3)                 |
|                                                       |       | Cr(1) | 3.60(3)      | 3.56(3)                 | 3.55(3)                 | 3.54(3)                 |
| lowest In-plane<br>and in-chain Cr-<br>Cr             | Cr(1) | Cr(3) | 3.44(4)      | 3.47(4)                 | 3.48(4)                 | 3.45(4)                 |
|                                                       |       | Cr(5) | 3.42(4)      | 3.44(3)                 | 3.49(3)                 | 3.49(3)                 |
|                                                       |       | Cr(2) | 3.36(3)      | 3.38(3)                 | 3.46(3)                 | 3.44(3)                 |
|                                                       | Cr(2) | Cr(2) | 3.36(3)      | 3.38(3)                 | 3.46(3)                 | 3.44(3)                 |

|                  |       |       |         |         |         |           |         |
|------------------|-------|-------|---------|---------|---------|-----------|---------|
|                  |       | Cr(4) | 3.53(3) | 3.49(3) | 3.55(6) | 3.54(3)   |         |
|                  | Cr(3) | Cr(3) | 3.83(4) | 3.84(3) | 3.86(4) | 3.87(4)   |         |
|                  |       | Cr(5) | 3.59(6) | 3.59(5) | 3.55(6) | 3.57(5)   |         |
|                  |       | Cr(4) | Cr(4)   | 3.61(3) | 3.55(3) | 3.49(3)   | 3.51(3) |
| bridging         |       | Cr(2) | Cr(5)   | 3.12(2) | 3.09(2) | 3.10(2)   | 3.12(2) |
| connection Cr-Cr |       | Cr(3) | Cr(4)   | 3.05(2) | 3.10(2) | 3.045(19) | 3.05(2) |
